# Supplementary material for: Phasic and tonic neuron ensemble codes for stimulus-environment conjunctions in the lateral entorhinal cortex
Source: eLife. 2017 Jul 6;6:e28611. doi: 10.7554/eLife.28611 (PMC5536943; doi:10.7554/eLife.28611)
Supplement: Figure 6—source data 1. — DOI: http://dx.doi.org/10.7554/eLife.28611.014 [file elife-28611-fig6-data1.xlsx]

## Sheet: Table 1
SV correlation		ITI						Trial
Task variables differed between blocks		None	Relationship	Modality	Environment	All		None	Relationship	Modality	Environment	All
Subsampling	Block pairs
1	1	0.495007	0.431279	0.253298	0.362495	0.268479		0.603005	0.444772	0.203721	0.352304	0.211095
	2	0.393886	0.443264	0.14457	0.340643	0.275461		0.577915	0.462755	0.173401	0.347304	0.175793
2	1	0.557941	0.542628	0.119818	0.266902	0.1148		0.52571	0.471731	0.127556	0.281444	0.258655
	2	0.475309	0.478473	0.311913	0.394592	0.27757		0.610363	0.565723	0.203653	0.262657	0.222815
3	1	0.456648	0.534913	0.194557	0.328535	0.200629		0.600244	0.49062	0.178972	0.240012	0.159041
	2	0.551147	0.487331	0.225372	0.362023	0.227617		0.547341	0.551143	0.154798	0.236782	0.227108
4	1	0.488518	0.490983	0.175148	0.324032	0.305938		0.576273	0.380003	0.188681	0.251661	0.163603
	2	0.462289	0.377476	0.249119	0.328921	0.208523		0.600094	0.433632	0.155686	0.196044	0.251631
5	1	0.635688	0.447806	0.235802	0.299636	0.260174		0.614955	0.490439	0.111662	0.249462	0.143871
	2	0.579457	0.500866	0.213852	0.325086	0.324482		0.547649	0.4938	0.215161	0.293602	0.178863
6	1	0.526753	0.45448	0.188772	0.300587	0.313558		0.527029	0.500493	0.152463	0.319545	0.230079
	2	0.572949	0.483453	0.191976	0.284627	0.239617		0.532697	0.459801	0.154981	0.290297	0.131561
7	1	0.534876	0.416168	0.15919	0.306481	0.237721		0.625483	0.619866	0.147545	0.351332	0.18663
	2	0.509572	0.481952	0.183496	0.275167	0.158067		0.534618	0.48447	0.124264	0.322958	0.129842
8	1	0.488801	0.505111	0.186694	0.290452	0.274061		0.543074	0.420117	0.0946364	0.264538	0.198534
	2	0.447183	0.456353	0.289795	0.314027	0.184545		0.531875	0.452676	0.123651	0.310657	0.229853
9	1	0.545815	0.435254	0.128543	0.33316	0.242351		0.618021	0.439948	0.168778	0.310901	0.25116
	2	0.622946	0.29286	0.178888	0.243697	0.341248		0.553282	0.441024	0.0772783	0.260002	0.271729
10	1	0.54103	0.479537	0.269602	0.353184	0.237966		0.561078	0.455885	0.179382	0.269636	0.170453
	2	0.567556	0.42918	0.234865	0.320092	0.297646		0.528573	0.440953	0.14234	0.306738	0.189558
11	1	0.537415	0.338456	0.169529	0.281103	0.122904		0.521429	0.325102	0.188831	0.28971	0.250108
	2	0.537184	0.319367	0.130565	0.316747	0.209716		0.447704	0.317376	0.0842165	0.235033	0.182262
12	1	0.504809	0.224871	0.158486	0.237851	0.132366		0.480339	0.236876	0.215647	0.241293	0.240116
	2	0.527006	0.319184	0.192035	0.201582	0.138081		0.462623	0.305613	0.241646	0.318915	0.18395
13	1	0.335491	0.309226	0.198241	0.331531	0.15902		0.566361	0.292252	0.114606	0.253488	0.146135
	2	0.385289	0.327427	0.270749	0.394281	0.113672		0.456407	0.36069	0.128291	0.220359	0.248402
14	1	0.359818	0.368184	0.294899	0.274997	0.131627		0.493612	0.282953	0.172683	0.263974	0.18479
	2	0.429635	0.255895	0.146236	0.273991	0.184648		0.450668	0.345676	0.175792	0.164713	0.131614
15	1	0.430025	0.34323	0.240766	0.273043	0.15809		0.607809	0.242093	0.180496	0.236994	0.117049
	2	0.505909	0.316104	0.247851	0.312919	0.0402327		0.410186	0.321402	0.134558	0.350959	0.234187
16	1	0.487579	0.379336	0.223098	0.264039	0.155762		0.560568	0.244567	0.239868	0.264555	0.167877
	2	0.496075	0.371932	0.192422	0.24219	0.140071		0.474423	0.26734	0.135192	0.283859	0.224689
17	1	0.549339	0.332377	0.128573	0.245115	0.218029		0.50636	0.340513	0.115201	0.249876	0.166587
	2	0.418344	0.310266	0.0765072	0.224458	0.0783579		0.407562	0.363948	0.169918	0.304651	0.230006
18	1	0.439189	0.245972	0.192733	0.378567	0.182799		0.495238	0.320121	0.0919722	0.2029	0.187725
	2	0.457421	0.389992	0.11774	0.234209	0.21933		0.455817	0.336488	0.177271	0.261757	0.0994552
19	1	0.480326	0.34969	0.253944	0.256252	0.11606		0.428349	0.311631	0.189561	0.277658	0.250629
	2	0.427435	0.372379	0.145217	0.181964	0.105915		0.47332	0.373328	0.264467	0.222178	0.188108
20	1	0.44103	0.23919	0.176879	0.265996	0.0957133		0.46168	0.377525	0.207415	0.24398	0.137614
	2	0.424601	0.394036	0.196524	0.261746	0.122096		0.462059	0.352971	0.150171	0.138173	0.218884
	lillietest	0	0	0	0	0		0	0	0	0	0
	Mean	0.490682	0.391912	0.197207	0.295173	0.195374		0.524545	0.395458	0.16141	0.268573	0.194301
	SEM	0.0107167	0.01351	0.00856072	0.00795194	0.0118761		0.00977462	0.0148674	0.00694904	0.00767369	0.00704675
