# Supplementary figures and images for: Phasic and tonic neuron ensemble codes for stimulus-environment conjunctions in the lateral entorhinal cortex
Source: eLife journal article supplement (doi:10.7554/elife.28611), 2017-07-06

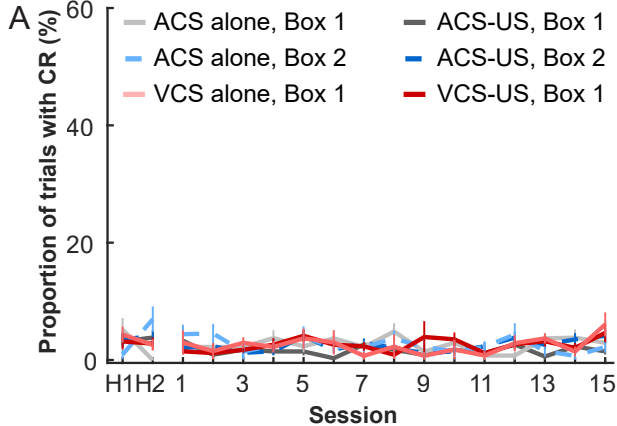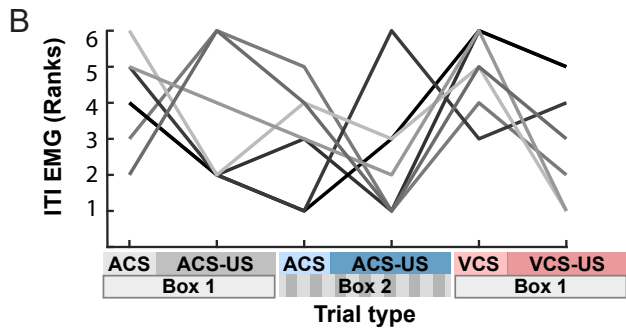

Supplement: supp [file elife-28611-supp-v1.zip]

A

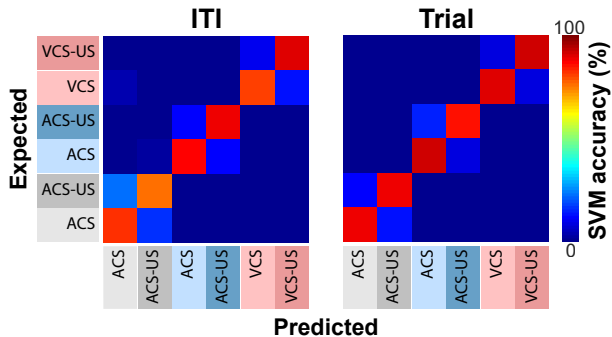

B

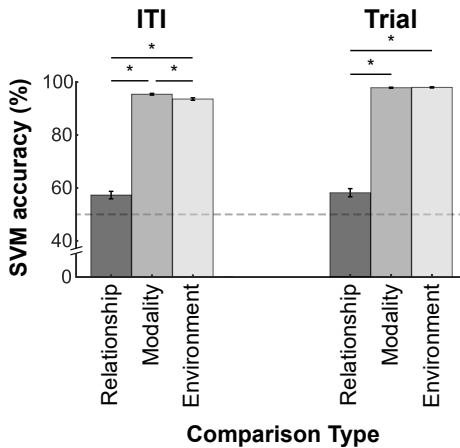

Supplement: supp [file elife-28611-supp-v1.zip]

## Early

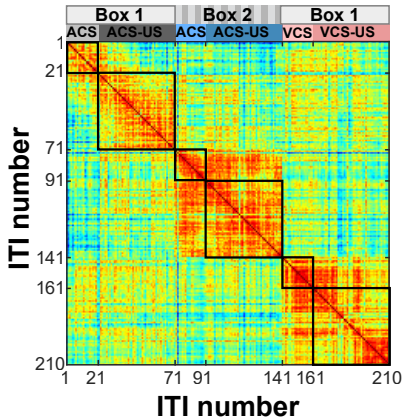

## Late

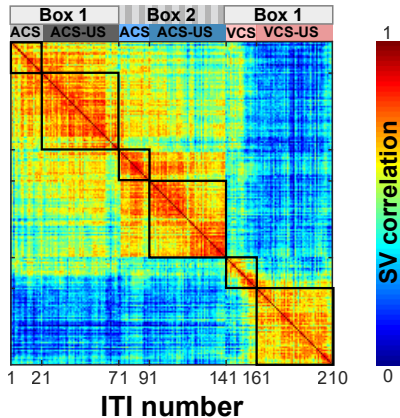

Supplement: supp [file elife-28611-supp-v1.zip]
